# Supplementary material for: Molecular Characterization, Expression Pattern, DNA Methylation and Gene Disruption of Figla in Blotched Snakehead (Channa maculata)
Source: MDPI journal article supplement (doi:10.3390/ani14030491), 2024-02-01

Figure S1

(a)

```
1 ggactgttaggggttcagtgctttgccagggacacttcgacctatagccaggggccgggatcgaaccactcacccctatggtccgtggacgactgcc
97 ttaccaactgagcgaatacgtttggcaatatagtgtagttttttaaagttaactttatagtggtcgaataatctgaaactgtttaaatctttta
193 aatccaaatgtgccacccttttctagatccgccctgacgtcgtgatggacacttgacagcctcacgtcaggtagccgtgggcagagggctaatt
289 aaacgtggagcacaggtgtgatggggccagctcgccctcgtgcagcctctgccctttgtgtttccatgaggactgagtggaaaacacactgctaga
1 M K V P E E E L M S D I L M R L T
385 aagtaacagtcctgtcaggttgggtatatgttagcattccgtgttgaaATGAAGGTGCCAGAGGAGGAATTAATGAGTGACATTTTGATGCGTTTAA
18 G E S A L P V Y S N I E K F R R T K D G L Y F V A E E F S E T V
481 CGGGCAGTCCGCCCTCCCGTATACAGCAACATTGAGAAATTCAGACGGACTAAGGACGGCTTGTACTTCGTAGCCGAAGAATTCAGTGAAACTG
50 K K R E L V N A K E R L R I R N L N T M F S R L K R M V P L M R
577 TCAAAAAGAGAGAATTGGTCAACGCCAAGGAACGACTGAGAATCCGGAACCTGAACACCATGTTTTCCCGCTTAAAGCGCATGGTGCCACTTATGC
82 P D R K P S K V D Y T L K A A T E Y I R L L V A V L Q D A D S D D
673 GACCAGACCGCAAAACCCAGTAAAGTCGACACACTCAAGCTGCAACAGAATACATCCGATTGCTTGTTCAGTTTTGCAGGATGCTGACAGTGATG
114 G S G T D F L K N A I T Y G Q T D G L G N D L W R V D D L L N M
769 ATGGCAGTGGGACTGATTTCTTAAAGATGCAATCACTTATGGTCAGACTGATGGCTTGGGCAATGACCTATGGAGAGTGGATGATCTGCTAAACA
146 S D E H M E D G F A M P P E P V A E D G D M S R L V L Q H C V M
865 TGTCAGATGAGCATATGGAAGATGGATTGCAATGCCCCAGAACCGGTAGCGGAGGATGGAGATATGAGCAGGCTGGTGTGCAACACTGTGTGA
178 P A Y Q F I I Q L A P D Q S S M S Q P C *
961 TGCCTGCGTACCAATTCATCATCCAACCTAGCACCTGATCAGTCTTCGATGTGCAACCTGCTGAgtggtgttttagagcagatggcttctacaagt
1057 acaagcttctacaaacgggcctgtgtgctttgacagaagaatcttgaagaaatgttttaattttactttgaaattcaaatttgtttgttttctc
1153 taaaaataatctcacagctgtatctttggcagccctcaataaatttcaggagacagtgatctttgtttttctattaagtgtttgttttcaagaa
1249 aaataaacagatttttatatttcagaaaaaaaaaaaaaaaaaaaaaaaaaaaaa
```

(b)

```
-1003 ctttgttgcactaagttgctgtgtcacttattatgtattgtctaggatcaaaaaattgatttatcttcagatttatctg
-923 tacattgacttttttgcacaaaaacatcagattgttgggtatttgactgatgcacgatcaagattgatggatagttag
-843 acccctaagagccgaagggggagacaccaaccaaatctgattgagtgtaaaaggggttgggtacctgttgtagtactttcag
Sp1
-763 caaaagaaaaattgaccaaactcgaagctgaaataaatgaccataattatagggaataaataataactattttggatcat
SOX3
-683 ttaagatgattttacacattttgtagcagttgcaaccaggcacattatcccttcaagggatggatttttagcttttccaa
-603 ctgtttatgattatgtgtttgactactttcagtaaaaaaaaaaagaaaaaacatgttcggtatttggcattttctagaat
-523 aacaccttgaaaacactatattattttcacagtttatttatatctgaagctgtatttttttttttttttttttttttttttttttt
SRY
-443 ttttctttcgggttatcccgtaggttcagggtccgcacacggatcattgtccgatgttgatttggcacagtttttaccg
-363 ccgatgtcttctctgaaggaacctcccccaattttctacccggcagctggggagggggaatggactgttaggggttcagtg
Sp1 Sp1
-283 tcttgcccagggacacttcgacctatagccaggggccgggagcgaaccactcacccctatggtccgaggagactgccttta
Esr2
-203 ccaactgagcgaatacgtttggcaatatagtgtagttttttaaagttaactttatagtggttcgaatatctgaaactgtt
-123 taaaatcttttaaatccaaatgtgccacccttttctagatcccccctgacccgctgatggacacttggacagcctcacg
Sp1
-43 tcaggtagccgagggcagagggctaattaaacgtggagcacaggtgtgatgggcccagctccccctcgtgcagcctctgc
+1
+37 cctttgtgtttccatccggactgagtggaacacactgctagaaagtaacagctctgtcaggttgggtatatgttagcat
SOX3
+117 tcgggttgaaATGAAGGTGCCAGAGGAGGAATTAATGAGTGACATTTTGATCGCTTAAAGGCGAGTCCGCCCTCCCC
Esr2 Sp1
+197 GTATACAGCAACATTGAGAAATTCAGACGACTAAGGACGCTTGTACTTCGTAGCCGAGAATTCAGTGAAACTGTCAA
+277 AAAGAGAGAATTGGTCAACGCAAGGAACGACTGAGAGtgagtttttgaataaacactactccattattgggtgtgtttga
+357 cgggatgatggctaagataagtcaggttcgtcagaacttactcacttaggtccaacattaacctcagctaacaagtagt
+437 accgttagcaacctaaatattgttatccgcataactgtgtttgtgtgtccgatgtatctgtcaatattccacagatt
```

Figure S2

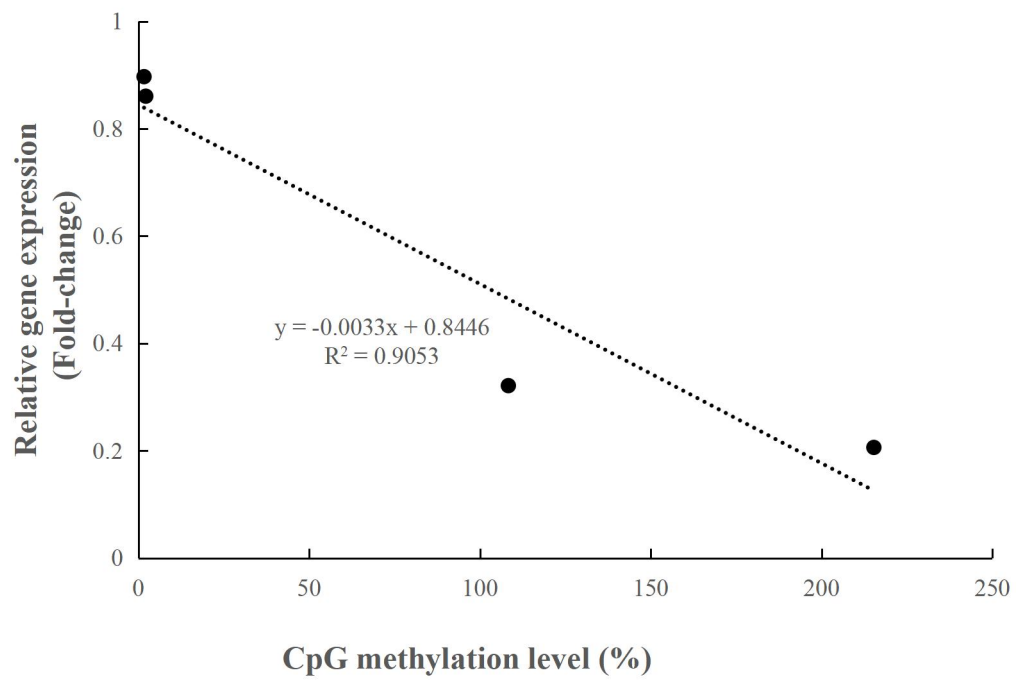

Supplement: s1 [file s1]
